# Supplementary material for: Integrated gene co-expression network analysis in the growth phase of Mycobacterium tuberculosis reveals new potential drug targets
Source: Royal Society of Chemistry journal article supplement (doi:10.1039/c3mb70278b), 2013-08-14
Supplement: c3mb70278b.xlsx [file c3mb70278b.xlsx]

## Sheet: Turquoise
Table S6. Co-expressed connections in agreement with the STRING database
node1_external_id	node2_external_id	neighborhood	fusion	cooccurence	homology	coexpression	experimental	knowledge	textmining	combined_score
Rv2245	Rv2244	0.971	0	0	0	0	0	0.9	0.97	0.999
Rv3029c	Rv3028c	0.939	0.578	0.766	0	0.788	0.782	0.942	0.966	0.999
Rv0641	Rv0056	0.564	0	0	0	0.79	0.885	0	0.925	0.999
Rv2246	Rv2243	0.893	0.043	0.765	0	0.245	0	0.9	0.903	0.999
Rv2246	Rv2244	0.945	0	0	0	0	0	0.9	0.966	0.999
Rv0780	Rv0777	0.8	0	0	0	0.716	0	0.9	0.875	0.999
Rv1596	Rv1595	0.971	0.634	0.392	0	0.267	0	0	0.962	0.999
Rv2890c	Rv2889c	0.962	0.287	0	0	0.782	0	0	0.964	0.999
Rv2244	Rv2243	0.92	0	0.282	0	0.115	0	0.9	0.962	0.999
Rv1613	Rv1611	0.923	0.01	0.762	0	0.499	0	0.9	0.794	0.999
Rv2245	Rv2243	0.918	0.036	0.766	0	0.3	0	0.9	0.921	0.999
Rv3443c	Rv0641	0.283	0	0	0	0.79	0.794	0	0.963	0.998
Rv1465	Rv1461	0.971	0	0.367	0	0	0	0	0.931	0.998
Rv0651	Rv0641	0.8	0	0	0	0.788	0.784	0	0.884	0.998
Rv2678c	Rv1485	0.8	0	0.766	0	0.212	0	0	0.967	0.998
Rv3443c	Rv2890c	0.8	0	0	0	0.788	0.36	0	0.963	0.998
Rv1295	Rv1294	0.971	0	0	0	0	0	0	0.941	0.998
Rv2496c	Rv0462	0.797	0	0.183	0	0.604	0.329	0.926	0.765	0.998
Rv3456c	Rv0641	0.684	0	0	0	0.792	0.806	0	0.885	0.998
Rv3456c	Rv3443c	0.8	0	0.215	0	0.786	0.8	0	0.86	0.998
Rv1437	Rv0363c	0.772	0	0	0	0.795	0.74	0	0.926	0.998
Rv3458c	Rv0641	0.654	0	0	0	0.792	0.564	0	0.941	0.997
Rv2889c	Rv2883c	0.8	0.74	0	0	0.732	0.106	0	0.838	0.997
Rv3458c	Rv0685	0.79	0	0.275	0	0.767	0.74	0	0.782	0.997
Rv2890c	Rv0641	0	0	0	0	0.753	0.776	0	0.966	0.997
Rv2889c	Rv0641	0	0	0.63	0	0.78	0	0	0.963	0.996
Rv3458c	Rv3456c	0.883	0	0	0	0.797	0.225	0	0.818	0.996
Rv2245	Rv1483	0.464	0	0.578	0	0	0	0.9	0.865	0.996
Rv2245	Rv1484	0.377	0	0.229	0	0.106	0	0.9	0.943	0.996
Rv3456c	Rv0651	0.64	0	0	0	0.78	0.794	0	0.826	0.996
Rv0641	Rv0639	0.896	0	0	0	0.768	0	0	0.862	0.996
Rv1308	Rv1307	0.772	0	0.188	0	0	0	0.9	0.847	0.996
Rv3917c	Rv1708	0.799	0.134	0.724	0	0	0.128	0	0.944	0.996
Rv0668	Rv0639	0.8	0	0.151	0	0.448	0.502	0	0.927	0.995
Rv2154c	Rv2152c	0.971	0	0.765	0	0.099	0	0	0.415	0.995
Rv3443c	Rv2889c	0.795	0	0.184	0	0.775	0	0	0.904	0.995
Rv0865	Rv0864	0.967	0.774	0	0	0	0	0	0.478	0.995
Rv2246	Rv1483	0.399	0.001	0.463	0	0	0	0.9	0.849	0.994
Rv3443c	Rv0651	0.279	0	0	0	0.76	0.796	0	0.862	0.994
Rv1411c	Rv1410c	0.883	0	0.757	0	0	0	0	0.835	0.994
Rv3456c	Rv0709	0.798	0	0	0	0.592	0.668	0	0.809	0.993
Rv3458c	Rv2890c	0.36	0	0.165	0	0.747	0.782	0	0.839	0.993
Rv3458c	Rv0668	0.764	0	0	0	0.689	0.256	0	0.899	0.993
Rv3458c	Rv0651	0.599	0	0	0	0.791	0.69	0	0.799	0.993
Rv3456c	Rv0056	0	0	0	0	0.79	0.795	0	0.868	0.993
Rv1341	Rv1340	0.939	0.894	0	0	0	0	0	0	0.993
Rv1449c	Rv0363c	0.43	0	0	0	0.488	0	0.9	0.798	0.992
Rv2246	Rv1484	0.354	0	0.335	0	0.08	0	0.9	0.86	0.992
Rv0668	Rv0641	0.8	0	0	0	0.584	0.32	0	0.869	0.991
Rv2984	Rv0496	0.752	0	0.587	0	0	0	0	0.926	0.991
Rv2139	Rv1385	0.772	0	0.158	0	0	0	0	0.961	0.991
Rv0668	Rv0651	0.8	0	0	0	0.618	0	0	0.887	0.99
Rv3458c	Rv3443c	0.799	0	0	0	0.776	0	0	0.805	0.99
Rv1449c	Rv1437	0.797	0	0	0	0.465	0	0	0.925	0.99
Rv0685	Rv0641	0.8	0	0	0	0.681	0.322	0	0.797	0.989
Rv1783	Rv1782	0.865	0	0.743	0	0	0	0	0.723	0.989
Rv3456c	Rv3455c	0.971	0	0	0	0.072	0	0	0.641	0.989
Rv2244	Rv1484	0.222	0	0	0	0	0	0.9	0.886	0.989
Rv0685	Rv0651	0.8	0	0	0	0.728	0	0	0.814	0.988
Rv3443c	Rv0056	0	0	0	0	0.778	0.803	0	0.761	0.988
Rv3456c	Rv0685	0.788	0	0	0	0.743	0.395	0	0.678	0.987
Rv0651	Rv0056	0	0	0	0	0.745	0.772	0	0.807	0.987
Rv2890c	Rv0651	0	0	0	0	0.695	0.702	0	0.881	0.987
Rv1711	Rv1709	0.97	0	0	0	0	0	0	0.546	0.986
Rv2889c	Rv0685	0	0	0	0	0.612	0.803	0	0.848	0.986
Rv2244	Rv1483	0.618	0	0	0	0	0	0.9	0.682	0.986
Rv2678c	Rv0509	0.783	0	0.225	0	0.068	0	0	0.927	0.986
Rv0098	Rv0097	0.959	0	0	0	0	0	0	0.659	0.985
Rv2496c	Rv0363c	0.676	0	0	0	0.306	0	0.8	0.713	0.984
Rv1485	Rv0509	0.576	0	0	0	0	0	0	0.965	0.984
Rv2992c	Rv0509	0	0	0	0	0	0	0.9	0.846	0.983
Rv2889c	Rv0056	0.165	0	0.153	0	0.74	0	0	0.926	0.983
Rv2890c	Rv0685	0	0	0	0	0.664	0.793	0	0.788	0.983
Rv0651	Rv0639	0.8	0	0.209	0	0.708	0	0	0.712	0.983
Rv3417c	Rv0685	0	0	0	0	0.486	0.22	0	0.962	0.982
Rv2883c	Rv1385	0	0	0	0	0	0	0.9	0.829	0.981
Rv3582c	Rv2868c	0.208	0	0.346	0	0	0	0	0.966	0.98
Rv3458c	Rv0709	0.796	0	0	0	0.66	0	0	0.754	0.98
Rv0709	Rv0651	0.609	0	0	0	0.512	0.78	0	0.589	0.979
Rv2839c	Rv2580c	0.704	0	0	0	0.385	0	0	0.899	0.979
Rv3858c	Rv2222c	0.455	0	0	0	0	0	0.9	0.676	0.979
Rv0685	Rv0639	0.8	0	0	0	0.552	0	0	0.801	0.979
Rv3456c	Rv0668	0.756	0	0	0	0.7	0.299	0	0.65	0.978
Rv3458c	Rv0639	0.639	0	0	0	0.691	0.123	0	0.813	0.977
Rv0709	Rv0641	0.594	0	0	0	0.45	0.682	0	0.743	0.977
Rv0058	Rv0056	0.947	0	0	0	0	0	0	0.6	0.977
Rv2889c	Rv2839c	0.684	0	0	0	0.561	0	0	0.842	0.975
Rv2890c	Rv2883c	0.8	0.141	0.201	0	0.352	0.088	0	0.768	0.974
Rv0058	Rv0054	0.897	0	0	0	0	0	0	0.764	0.974
Rv2839c	Rv0668	0	0	0.166	0	0.488	0.315	0	0.927	0.974
Rv0100	Rv0099	0.858	0	0	0	0	0	0	0.833	0.974
Rv1837c	Rv1257c	0.615	0	0.177	0	0.188	0	0.9	0.196	0.973
Rv0100	Rv0097	0.852	0	0	0	0	0	0	0.832	0.973
Rv3456c	Rv2890c	0.28	0	0	0	0.721	0.302	0	0.839	0.972
Rv3443c	Rv0709	0.688	0	0	0	0.427	0.683	0	0.583	0.971
Rv2839c	Rv2837c	0.971	0	0	0	0	0	0	0.076	0.971
Rv1485	Rv1451	0	0	0	0	0	0	0.9	0.727	0.97
Rv3025c	Rv1465	0.8	0	0.169	0	0	0.172	0	0.821	0.97
Rv3458c	Rv2889c	0.285	0	0	0	0.748	0	0	0.856	0.97
Rv2868c	Rv2580c	0.798	0	0	0	0.639	0	0	0.631	0.969
Rv0685	Rv0668	0.8	0	0.156	0	0.26	0	0	0.8	0.969
Rv2839c	Rv0641	0.551	0	0.18	0	0.663	0	0	0.799	0.969
Rv2890c	Rv0056	0.168	0	0	0	0.601	0	0	0.916	0.968
Rv2391	Rv2222c	0	0	0	0	0	0	0.9	0.701	0.968
Rv3458c	Rv0056	0.344	0	0	0	0.769	0	0	0.817	0.968
Rv1437	Rv1240	0	0	0	0	0.604	0	0	0.923	0.967
Rv2145c	Rv0015c	0	0	0	0	0	0	0	0.966	0.966
Rv2890c	Rv2839c	0.688	0	0.298	0	0.291	0	0	0.819	0.966
Rv2496c	Rv1449c	0.328	0	0	0	0.254	0	0.8	0.703	0.963
Rv2889c	Rv1308	0.464	0	0	0	0.689	0	0	0.801	0.962
Rv3443c	Rv0685	0.57	0	0	0	0.737	0	0	0.708	0.962
Rv0099	Rv0097	0.858	0	0.287	0	0	0	0	0.658	0.961
Rv3879c	Rv3874	0	0	0.766	0	0	0	0	0.844	0.961
Rv1308	Rv0685	0.264	0	0	0	0.727	0	0	0.825	0.96
Rv1472	Rv0860	0	0.005	0	0	0.08	0	0.9	0.585	0.956
Rv3458c	Rv3455c	0.883	0	0	0	0	0	0	0.64	0.955
Rv2243	Rv1483	0.659	0.002	0.748	0	0	0	0	0.547	0.955
Rv2071c	Rv0509	0.773	0	0.26	0	0	0	0	0.762	0.954
Rv2839c	Rv0639	0.356	0	0	0	0.364	0	0	0.9	0.953
Rv3443c	Rv2992c	0.657	0	0	0	0.623	0	0	0.673	0.952
Rv3455c	Rv3443c	0.8	0	0	0	0.126	0	0	0.759	0.952
Rv3456c	Rv2889c	0.271	0	0	0	0.751	0	0	0.77	0.952
Rv2889c	Rv0651	0	0	0	0	0.717	0	0	0.838	0.951
Rv0984	Rv0864	0.756	0.591	0.171	0	0.091	0	0	0.491	0.95
Rv0056	Rv0054	0.916	0	0	0	0.3	0	0	0.25	0.95
Rv3443c	Rv0668	0.672	0	0	0	0.29	0.097	0	0.797	0.948
Rv1196	Rv1195	0.694	0	0	0	0	0	0	0.841	0.948
Rv2889c	Rv0639	0	0	0	0	0.655	0	0	0.86	0.948
Rv2244	Rv0242c	0.163	0	0	0	0	0	0.9	0.446	0.947
Rv2225	Rv1596	0.746	0	0.166	0	0.222	0	0	0.736	0.947
Rv2883c	Rv2839c	0.726	0	0	0	0.312	0	0	0.755	0.947
Rv3456c	Rv1308	0.535	0	0	0	0.73	0	0	0.624	0.946
Rv1341	Rv0668	0	0	0	0	0	0	0.9	0.493	0.945
Rv0100	Rv0098	0.852	0	0	0	0	0	0	0.647	0.944
Rv1837c	Rv1240	0	0	0	0	0	0	0.9	0.48	0.944
Rv2245	Rv0242c	0.079	0	0	0	0	0	0.9	0.46	0.943
Rv2391	Rv1162	0	0	0	0	0	0	0.9	0.458	0.942
Rv2881c	Rv2244	0.212	0	0	0	0	0	0.9	0.354	0.942
Rv0709	Rv0685	0.8	0	0	0	0.533	0	0	0.436	0.94
Rv1484	Rv1483	0.791	0	0.263	0	0	0	0	0.646	0.938
Rv1183	Rv1182	0.645	0	0	0	0	0	0	0.837	0.938
Rv2992c	Rv1437	0.497	0	0	0	0.1	0	0	0.881	0.938
Rv1294	Rv1079	0.358	0	0	0	0	0	0.8	0.581	0.938
Rv2992c	Rv2580c	0.127	0	0	0	0.372	0	0	0.901	0.938
Rv2992c	Rv2890c	0.34	0	0	0	0.546	0	0	0.819	0.938
Rv3443c	Rv2883c	0.663	0	0	0	0.647	0.101	0	0.516	0.937
Rv0685	Rv0056	0.243	0	0	0	0.671	0	0	0.774	0.936
Rv1162	Rv0267	0.75	0	0.405	0	0.151	0	0	0.584	0.936
Rv1308	Rv0641	0	0	0	0	0.692	0.403	0	0.689	0.935
Rv0849	Rv0848	0.865	0	0.552	0	0	0	0	0	0.935
Rv2992c	Rv2222c	0.206	0	0	0	0	0	0.8	0.636	0.934
Rv3001c	Rv1295	0.586	0	0	0	0	0	0	0.85	0.933
Rv3865	Rv3864	0.604	0	0	0	0	0	0	0.841	0.932
Rv3443c	Rv2839c	0.488	0	0	0	0.582	0.16	0	0.688	0.932
Rv2992c	Rv2883c	0.261	0	0	0	0.592	0	0	0.801	0.932
Rv3458c	Rv2839c	0.164	0	0	0	0.636	0	0	0.799	0.93
Rv3456c	Rv0639	0.673	0	0	0	0.657	0	0	0.449	0.929
Rv0860	Rv0222	0	0.009	0	0	0.094	0	0.9	0.308	0.928
Rv2992c	Rv2889c	0.308	0	0	0	0.592	0	0	0.774	0.927
Rv2992c	Rv0056	0.533	0	0	0	0.27	0	0	0.809	0.926
Rv3075c	Rv1240	0	0	0	0	0	0	0.9	0.289	0.924
Rv3028c	Rv1308	0.112	0	0	0	0.673	0.334	0	0.676	0.924
Rv1437	Rv0462	0	0	0	0	0.446	0.161	0	0.856	0.924
Rv2246	Rv0242c	0	0	0	0	0	0	0.9	0.29	0.924
Rv2883c	Rv2139	0	0	0	0	0.233	0	0	0.908	0.924
Rv2839c	Rv0056	0	0	0	0	0.6	0	0	0.82	0.923
Rv2883c	Rv0639	0.237	0	0	0	0.55	0	0	0.799	0.921
Rv3417c	Rv1437	0.082	0	0	0	0.499	0	0	0.85	0.921
Rv0099	Rv0098	0.858	0	0	0	0	0	0	0.469	0.92
Rv2992c	Rv0641	0.317	0	0	0	0.488	0	0	0.799	0.92
Rv0222	Rv0131c	0	0	0	0	0	0	0.9	0.258	0.92
Rv2839c	Rv0651	0.387	0	0	0	0.519	0.124	0	0.742	0.919
Rv3874	Rv3872	0.52	0	0	0	0	0	0	0.841	0.918
Rv3455c	Rv1711	0	0	0.666	0	0.094	0	0	0.762	0.918
Rv3458c	Rv2580c	0.464	0	0	0	0.155	0	0	0.842	0.918
Rv0695	Rv0694	0.49	0	0	0	0	0	0	0.848	0.917
Rv2992c	Rv2839c	0.18	0	0	0	0.288	0	0	0.874	0.916
Rv2839c	Rv1437	0.435	0	0	0	0.115	0	0	0.853	0.916
Rv2391	Rv0848	0	0	0	0	0	0	0.9	0.214	0.916
Rv3039c	Rv0860	0	0	0	0.675	0.065	0	0.9	0.515	0.915
Rv2992c	Rv0639	0.376	0	0	0	0.331	0	0	0.822	0.915
Rv2139	Rv1658	0.589	0	0	0	0.267	0	0	0.749	0.914
Rv0709	Rv0668	0.772	0	0	0	0.463	0	0	0.38	0.914
Rv2883c	Rv1308	0.329	0	0	0	0.428	0	0	0.804	0.914
Rv2504c	Rv0860	0	0	0	0	0	0	0.9	0.166	0.911
Rv2889c	Rv0668	0	0	0	0	0.408	0	0	0.86	0.911
Rv3001c	Rv2883c	0.44	0	0	0	0	0	0	0.851	0.911
Rv3858c	Rv1240	0	0	0	0	0	0	0.8	0.582	0.91
Rv1709	Rv1708	0.865	0.269	0	0	0	0	0	0.195	0.91
Rv2982c	Rv2244	0.088	0	0	0	0	0	0.9	0.139	0.91
Rv3250c	Rv2678c	0.126	0	0	0	0.246	0	0	0.878	0.909
Rv2890c	Rv0639	0	0	0	0	0.556	0.097	0	0.8	0.908
Rv2580c	Rv1437	0.669	0	0	0	0.139	0	0	0.715	0.908
Rv2496c	Rv0694	0.094	0	0	0	0	0	0.9	0.105	0.907
Rv2580c	Rv0668	0.384	0	0.204	0	0.123	0	0	0.823	0.907
Rv2678c	Rv1449c	0.66	0	0	0	0.336	0	0	0.636	0.906
Rv3455c	Rv2580c	0.346	0	0	0	0	0	0	0.861	0.903
Rv3009c	Rv2992c	0.572	0	0	0	0.305	0	0	0.711	0.902
Rv2678c	Rv1611	0.628	0	0	0	0.222	0	0	0.705	0.902
Rv3456c	Rv2839c	0.192	0	0	0	0.6	0	0	0.732	0.901
Rv1308	Rv0651	0	0	0	0	0.594	0	0	0.772	0.901
Rv0860	Rv0131c	0	0	0	0	0	0	0.9	0.067	0.9
Rv0668	Rv0056	0	0	0	0	0.391	0.109	0	0.836	0.899
Rv1341	Rv1264	0	0	0	0	0	0	0.9	0	0.899
Rv2982c	Rv2482c	0	0	0	0	0	0	0.9	0	0.899
Rv2890c	Rv2881c	0.8	0	0	0	0	0	0	0.527	0.899
Rv1472	Rv0131c	0	0	0	0	0	0	0.9	0	0.899
Rv1658	Rv1595	0	0	0	0	0	0	0.9	0	0.899
Rv3039c	Rv0131c	0	0	0	0	0	0	0.9	0	0.899
Rv1264	Rv0668	0	0	0	0	0	0	0.9	0	0.899
Rv3858c	Rv2678c	0.732	0	0	0	0	0	0	0.636	0.896
Rv3582c	Rv2992c	0.773	0	0	0	0.065	0	0	0.56	0.894
Rv2881c	Rv2839c	0.684	0	0	0	0.075	0	0	0.681	0.894
Rv3455c	Rv0668	0.639	0	0	0	0	0	0	0.725	0.894
Rv2580c	Rv0056	0.444	0	0	0	0.138	0	0	0.805	0.893
Rv3443c	Rv0639	0.356	0	0	0	0.512	0	0	0.7	0.892
Rv2883c	Rv2881c	0.884	0	0	0	0.125	0	0	0.064	0.892
Rv3417c	Rv2890c	0.198	0	0	0	0.072	0.214	0	0.846	0.89
Rv1658	Rv1295	0.452	0	0	0	0.141	0	0	0.792	0.889
Rv1437	Rv0056	0	0	0	0	0.227	0.459	0	0.766	0.889
Rv1240	Rv0777	0	0	0	0	0.278	0	0.8	0.317	0.888
Rv1711	Rv1708	0.865	0	0	0	0	0	0	0.224	0.888
Rv1841c	Rv1837c	0.382	0	0	0	0	0	0	0.83	0.887
Rv3417c	Rv2839c	0.112	0	0	0	0.221	0	0	0.854	0.886
Rv2889c	Rv2580c	0.106	0	0	0	0.231	0	0	0.852	0.884
Rv2890c	Rv0668	0	0	0	0	0.226	0	0	0.86	0.884
Rv3443c	Rv1437	0.305	0	0	0	0.337	0	0	0.779	0.884
Rv3455c	Rv0641	0.471	0	0	0	0.115	0	0	0.779	0.882
Rv3389c	Rv0130	0	0	0	0	0	0	0	0.882	0.882
Rv1308	Rv1240	0	0	0	0	0.73	0	0	0.582	0.88
Rv0639	Rv0054	0.108	0	0	0	0.174	0	0	0.857	0.88
Rv3417c	Rv2457c	0.126	0	0	0	0.111	0.204	0	0.837	0.878
Rv2883c	Rv0641	0.416	0	0	0	0.667	0.121	0	0.408	0.877
Rv2678c	Rv1437	0.239	0	0	0	0.218	0	0	0.819	0.877
Rv3001c	Rv1294	0.364	0	0	0	0	0	0	0.815	0.875
Rv1437	Rv0685	0.178	0	0	0	0.34	0	0	0.796	0.874
Rv2839c	Rv1308	0.363	0	0	0	0.163	0	0	0.793	0.874
Rv3841	Rv3250c	0.77	0	0	0	0	0	0	0.483	0.873
Rv3455c	Rv1613	0.79	0	0.18	0	0	0	0	0.35	0.872
Rv3001c	Rv2992c	0.372	0	0	0	0	0	0	0.809	0.872
Rv3455c	Rv1611	0.312	0	0	0	0.082	0	0	0.821	0.871
Rv2986c	Rv2678c	0.42	0	0	0	0	0	0	0.79	0.87
Rv2678c	Rv1240	0	0	0	0	0.139	0	0	0.857	0.869
Rv2726c	Rv2725c	0.868	0	0	0	0	0	0	0	0.868
Rv3028c	Rv2496c	0.304	0	0	0	0.712	0.243	0	0.272	0.866
Rv1944c	Rv1942c	0.865	0	0	0	0	0	0	0	0.865
Rv2496c	Rv0685	0	0	0	0	0.481	0	0	0.756	0.865
Rv0497	Rv0496	0.865	0	0	0	0	0	0	0	0.865
Rv3001c	Rv1437	0	0	0	0	0.119	0	0	0.854	0.863
Rv2702	Rv1449c	0	0	0	0	0	0	0.8	0.362	0.863
Rv2994	Rv2477c	0.18	0	0	0	0	0	0	0.844	0.863
Rv2763c	Rv2457c	0.592	0	0	0	0	0	0	0.684	0.863
Rv2726c	Rv2152c	0.192	0	0	0	0	0	0	0.84	0.862
Rv2900c	Rv1837c	0	0	0	0	0	0	0.8	0.35	0.861
Rv1308	Rv0056	0.128	0	0	0	0.455	0.413	0	0.591	0.861
Rv3443c	Rv2580c	0.356	0	0	0	0.227	0	0	0.752	0.86
Rv3458c	Rv1308	0	0	0	0	0.68	0	0	0.589	0.86
Rv3001c	Rv2225	0	0	0	0	0	0	0	0.858	0.859
Rv1611	Rv1437	0.238	0	0	0	0	0	0	0.827	0.859
Rv1449c	Rv1308	0.224	0	0	0	0.252	0	0	0.784	0.858
Rv3028c	Rv2971	0	0	0	0	0.117	0	0	0.848	0.857
Rv2889c	Rv1437	0.156	0	0	0	0.163	0	0	0.822	0.857
Rv0709	Rv0056	0	0	0	0	0.376	0.67	0	0.389	0.857
Rv1240	Rv0462	0.121	0	0	0	0.492	0	0	0.718	0.856
Rv2159c	Rv2152c	0.737	0	0	0	0	0	0	0.485	0.855
Rv3443c	Rv1308	0.4	0	0	0	0.617	0	0	0.446	0.855
Rv3025c	Rv1596	0.719	0	0	0	0	0	0	0.514	0.854
Rv2725c	Rv1709	0.19	0	0	0	0	0	0	0.832	0.854
Rv2580c	Rv0639	0	0	0	0	0.108	0	0	0.846	0.854
Rv1485	Rv1484	0.853	0	0	0	0	0	0	0	0.853
Rv1611	Rv1308	0	0	0	0	0	0	0	0.852	0.852
Rv3417c	Rv2678c	0	0	0	0	0.12	0	0	0.842	0.852
Rv2984	Rv2702	0	0	0	0	0	0	0	0.851	0.851
Rv3417c	Rv0668	0.068	0	0	0	0	0	0	0.85	0.851
Rv3803c	Rv1837c	0	0	0	0	0	0	0	0.852	0.851
Rv1942c	Rv1103c	0.1	0	0	0	0	0	0	0.844	0.85
Rv2883c	Rv0685	0	0	0	0	0.27	0.244	0	0.761	0.85
Rv2889c	Rv2881c	0.8	0	0	0	0	0	0	0.3	0.85
Rv3458c	Rv2992c	0.167	0	0	0	0.226	0	0	0.794	0.849
Rv3458c	Rv1650	0.274	0	0	0	0.1	0	0	0.797	0.849
Rv2902c	Rv2763c	0.55	0	0	0	0	0	0	0.687	0.849
Rv2868c	Rv1449c	0.22	0	0	0	0	0	0	0.818	0.849
Rv2889c	Rv2888c	0.848	0	0	0	0	0	0	0	0.848
Rv3039c	Rv3038c	0.827	0	0.17	0	0	0	0	0	0.847
Rv2139	Rv0777	0	0	0	0	0.424	0	0	0.752	0.847
Rv1437	Rv0780	0.621	0	0	0	0	0	0	0.621	0.847
Rv2391	Rv2071c	0.722	0	0.348	0	0	0	0	0.256	0.846
Rv2902c	Rv2228c	0	0	0	0	0	0	0	0.846	0.846
Rv0639	Rv0056	0.424	0	0	0	0.608	0	0	0.4	0.846
Rv3803c	Rv1926c	0	0	0	0	0	0	0	0.845	0.845
Rv1596	Rv1593c	0.676	0	0	0	0	0	0	0.551	0.845
Rv2678c	Rv1451	0	0	0.156	0	0	0	0	0.827	0.844
Rv2678c	Rv2139	0	0	0	0	0.173	0	0	0.819	0.841
Rv2477c	Rv2459	0	0	0	0	0	0	0	0.841	0.841
Rv3009c	Rv1173	0.457	0	0	0	0	0	0	0.727	0.841
Rv2496c	Rv1437	0.209	0	0	0	0.319	0	0	0.741	0.841
Rv3075c	Rv2971	0	0	0	0	0	0	0	0.841	0.841
Rv2225	Rv2112c	0	0	0	0	0	0	0	0.841	0.841
Rv1658	Rv0780	0.409	0	0	0	0.159	0	0	0.719	0.841
Rv3001c	Rv2139	0	0	0	0	0.227	0	0	0.806	0.84
Rv3455c	Rv2225	0.236	0	0	0	0	0	0	0.802	0.838
Rv2883c	Rv1437	0.173	0	0	0	0	0	0	0.816	0.838
Rv2154c	Rv2149c	0.625	0	0.19	0	0	0	0	0.531	0.838
Rv3443c	Rv2678c	0	0	0	0	0.409	0	0	0.743	0.838
Rv2992c	Rv0685	0.172	0	0	0	0.374	0	0	0.726	0.838
Rv2992c	Rv2678c	0	0	0	0	0.241	0	0	0.8	0.838
Rv3035	Rv1079	0	0	0	0	0	0	0	0.838	0.837
Rv3879c	Rv3872	0	0	0	0	0	0	0	0.837	0.837
Rv1197	Rv1047	0	0	0	0	0	0	0	0.837	0.837
Rv2763c	Rv2580c	0.291	0	0	0	0	0	0	0.784	0.837
Rv3455c	Rv2889c	0.294	0	0	0	0	0	0	0.783	0.837
Rv1449c	Rv0462	0.143	0	0	0	0.212	0	0	0.787	0.836
Rv1308	Rv0462	0.208	0	0	0	0.635	0	0	0.504	0.836
Rv2992c	Rv0668	0.224	0	0	0	0	0	0	0.802	0.836
Rv3858c	Rv2992c	0	0	0	0	0	0	0.8	0.232	0.836
Rv1386	Rv0145	0	0	0	0	0	0	0	0.835	0.835
Rv1485	Rv0259c	0	0	0	0	0	0	0	0.834	0.833
Rv1451	Rv1294	0.504	0	0	0	0	0	0	0.684	0.833
Rv0130	Rv0098	0	0	0	0	0	0	0	0.834	0.833
Rv3417c	Rv2889c	0.189	0	0	0	0.071	0	0	0.805	0.833
Rv1593c	Rv0418	0	0	0	0	0	0	0	0.834	0.833
Rv1437	Rv1295	0.447	0	0	0	0	0	0	0.716	0.832
Rv1510	Rv1257c	0	0	0	0	0	0	0	0.831	0.831
Rv3001c	Rv2996c	0.405	0	0	0	0.127	0	0	0.711	0.829
Rv2881c	Rv2868c	0.796	0	0	0	0	0	0	0.213	0.829
Rv2678c	Rv0641	0.121	0	0	0	0.414	0	0	0.708	0.828
Rv2139	Rv1295	0.117	0	0	0	0	0	0	0.817	0.828
Rv1437	Rv1308	0.326	0	0	0	0.584	0	0	0.462	0.828
Rv2580c	Rv0651	0	0	0.191	0	0.109	0	0	0.789	0.827
Rv1437	Rv0641	0	0	0	0	0.247	0	0	0.785	0.827
Rv3028c	Rv1613	0.592	0	0	0	0	0	0	0.604	0.827
Rv3458c	Rv2444c	0.08	0	0	0	0	0.336	0	0.749	0.826
Rv2678c	Rv0668	0.402	0	0	0	0.08	0	0	0.72	0.824
Rv2889c	Rv2868c	0.768	0	0	0	0	0	0	0.288	0.823
Rv2883c	Rv2868c	0.792	0	0	0	0	0	0	0.201	0.823
Rv2678c	Rv1308	0.383	0	0	0	0	0	0	0.731	0.823
Rv3456c	Rv2580c	0.376	0	0	0	0.152	0	0	0.705	0.822
Rv1240	Rv0860	0	0	0	0	0.601	0	0	0.583	0.822
Rv3028c	Rv1240	0.088	0	0	0	0.732	0	0	0.354	0.821
Rv2246	Rv2245	0.806	0	0.766	0.951	0	0	0	0.937	0.821
Rv2883c	Rv2580c	0.107	0	0.196	0	0.272	0	0	0.716	0.82
Rv2890c	Rv1437	0.139	0	0	0	0	0	0	0.802	0.818
Rv3025c	Rv1461	0.552	0	0	0	0	0	0	0.62	0.818
Rv3417c	Rv0639	0	0	0	0	0	0.083	0	0.812	0.816
Rv3417c	Rv2496c	0.154	0	0	0	0.148	0.225	0	0.728	0.816
Rv1611	Rv1294	0.106	0	0	0	0	0	0	0.806	0.816
Rv0668	Rv0058	0.128	0	0.171	0	0	0	0	0.775	0.815
Rv3443c	Rv3009c	0.692	0	0	0	0.298	0	0	0.249	0.815
Rv2152c	Rv0639	0	0	0	0	0	0.16	0	0.792	0.814
Rv2890c	Rv2580c	0.107	0	0	0	0	0	0	0.805	0.814
Rv2243	Rv1484	0.347	0	0	0	0.224	0	0	0.676	0.813
Rv2889c	Rv1449c	0	0	0	0	0.234	0	0	0.77	0.813
Rv2900c	Rv1240	0	0	0	0	0	0	0.8	0.128	0.813
Rv2996c	Rv1658	0.304	0	0	0	0.208	0	0	0.7	0.811
Rv2996c	Rv1437	0.121	0	0	0	0.158	0	0	0.776	0.811
Rv2222c	Rv1437	0.16	0	0.164	0	0	0	0	0.763	0.81
Rv1451	Rv0509	0	0	0	0	0.305	0	0	0.744	0.81
Rv2890c	Rv2888c	0.809	0	0	0	0	0	0	0	0.81
Rv1611	Rv1295	0.084	0	0	0	0	0	0	0.806	0.81
Rv1437	Rv0651	0	0	0	0	0.175	0	0	0.784	0.81
Rv1182	Rv1181	0.678	0	0	0	0	0	0	0.446	0.809
Rv2139	Rv1437	0	0	0	0	0.152	0	0	0.789	0.809
Rv3456c	Rv2992c	0.149	0	0	0	0.388	0	0	0.676	0.808
Rv2902c	Rv2890c	0.688	0	0	0	0	0	0	0.424	0.808
Rv2902c	Rv2889c	0.701	0	0	0	0	0	0	0.395	0.807
Rv3028c	Rv0685	0.178	0	0	0	0.158	0.141	0	0.731	0.806
Rv2702	Rv0363c	0	0	0	0	0	0	0.8	0.094	0.806
Rv2984	Rv1611	0	0	0	0	0	0	0	0.806	0.806
Rv1340	Rv0054	0.348	0	0	0	0	0	0	0.719	0.805
Rv2763c	Rv2757c	0.542	0	0	0	0	0	0	0.601	0.805
Rv2889c	Rv0363c	0.151	0	0	0	0	0	0	0.785	0.805
Rv3872	Rv3865	0.328	0	0	0	0	0	0	0.729	0.805
Rv2678c	Rv0462	0	0	0	0	0.186	0	0	0.773	0.804
Rv3456c	Rv2883c	0.104	0	0	0	0.459	0	0	0.643	0.804
Rv3075c	Rv0777	0.079	0	0	0	0	0	0.8	0	0.803
Rv3029c	Rv1613	0.565	0	0	0	0	0	0	0.575	0.803
Rv3417c	Rv2763c	0	0	0	0	0	0.256	0	0.751	0.802
Rv2992c	Rv1308	0.582	0	0	0	0.358	0	0	0.352	0.802
Rv2678c	Rv2580c	0.285	0	0	0	0.244	0	0	0.677	0.802
Rv1611	Rv0864	0.23	0	0	0	0	0	0	0.757	0.801
Rv1595	Rv1240	0	0	0	0	0	0	0.8	0.069	0.801
Rv2902c	Rv2244	0.517	0	0	0	0	0	0	0.612	0.8
Rv3858c	Rv3075c	0	0	0	0	0	0	0.8	0	0.8
Rv3075c	Rv1595	0	0	0	0	0	0	0.8	0	0.8
Rv2457c	Rv2225	0	0	0	0	0	0	0	0.8	0.8
Rv3417c	Rv2992c	0	0	0	0	0	0	0	0.8	0.8
Rv0864	Rv0668	0	0	0	0	0	0	0.8	0	0.8
Rv1264	Rv0864	0	0	0	0	0	0	0.8	0	0.8

## Sheet: Brown
Table S6. Co-expressed connections in agreement with the STRING database
node1_external_id	node2_external_id	neighborhood	fusion	cooccurence	homology	coexpression	experimental	knowledge	textmining	combined_score
Rv3156	Rv3152	0.963	0.56	0.766	0	0.767	0	0.951	0.965	0.999
Rv3157	Rv3154	0.963	0	0	0	0.32	0.332	0.9	0.887	0.999
Rv3147	Rv3146	0.971	0.506	0.534	0	0.67	0.6	0.934	0.776	0.999
Rv2938	Rv2936	0.952	0.019	0.76	0	0	0	0.9	0.843	0.999
Rv3158	Rv3147	0.901	0	0.556	0	0.324	0.426	0.9	0.919	0.999
Rv3155	Rv3146	0.906	0	0.193	0	0.612	0	0.9	0.742	0.999
Rv3158	Rv3155	0.963	0.002	0.462	0	0.676	0.53	0.9	0.926	0.999
Rv3148	Rv3146	0.971	0.556	0.705	0	0.756	0.782	0.95	0.888	0.999
Rv3155	Rv3152	0.971	0.651	0.634	0	0.792	0	0.9	0.964	0.999
Rv3158	Rv3148	0.901	0	0.609	0	0.555	0.717	0.902	0.855	0.999
Rv3158	Rv3154	0.963	0	0.164	0	0.304	0.536	0.9	0.917	0.999
Rv3155	Rv3154	0.971	0	0.161	0	0.437	0.397	0.9	0.929	0.999
Rv3150	Rv3148	0.971	0	0	0	0.796	0.678	0.963	0.843	0.999
Rv3154	Rv3153	0.971	0	0.172	0	0.312	0	0.9	0.921	0.999
Rv3149	Rv3147	0.971	0.083	0.476	0	0.743	0.568	0.9	0.73	0.999
Rv3152	Rv3149	0.906	0	0	0	0.611	0	0.9	0.964	0.999
Rv3157	Rv3155	0.963	0	0.302	0	0.714	0.555	0.9	0.913	0.999
Rv3148	Rv3147	0.971	0.897	0.766	0	0.752	0.795	0.942	0.854	0.999
Rv3152	Rv3147	0.906	0	0.416	0	0.432	0.575	0.939	0.914	0.999
Rv3157	Rv3147	0.901	0	0.247	0	0.444	0.142	0.925	0.808	0.999
Rv3158	Rv3156	0.971	0	0.766	0.581	0.632	0.502	0.901	0.963	0.999
Rv3154	Rv3148	0.906	0	0	0	0.335	0.527	0.9	0.912	0.999
Rv3157	Rv3152	0.963	0	0.766	0	0.724	0	0.936	0.932	0.999
Rv3153	Rv3148	0.906	0	0.671	0	0.78	0.791	0.959	0.964	0.999
Rv3149	Rv3146	0.971	0	0	0	0.687	0.528	0.9	0.612	0.999
Rv3156	Rv3154	0.963	0	0.204	0	0.365	0.372	0.9	0.899	0.999
Rv3157	Rv3156	0.971	0	0.766	0.556	0.716	0.556	0.933	0.966	0.999
Rv3152	Rv3150	0.906	0	0	0	0.774	0	0.959	0.838	0.999
Rv3156	Rv3148	0.901	0	0.5	0	0.682	0.716	0.955	0.966	0.999
Rv3152	Rv3146	0.906	0	0.366	0	0.472	0.351	0.947	0.783	0.999
Rv3157	Rv3149	0.901	0	0	0	0.472	0	0.9	0.858	0.999
Rv3158	Rv3153	0.963	0	0	0	0.62	0	0.902	0.926	0.999
Rv3153	Rv3149	0.906	0	0.464	0	0.789	0.602	0.9	0.912	0.999
Rv3150	Rv3146	0.971	0	0	0	0.78	0.598	0.951	0.587	0.999
Rv3155	Rv3150	0.906	0	0	0	0.782	0	0.9	0.818	0.999
Rv2429	Rv2428	0.949	0	0.745	0	0	0	0.9	0.985	0.999
Rv3156	Rv3147	0.901	0	0	0	0.349	0.366	0.937	0.937	0.999
Rv3150	Rv3149	0.971	0.837	0.766	0	0.78	0.652	0.9	0.966	0.999
Rv3149	Rv3148	0.971	0.123	0.183	0	0.76	0.655	0.9	0.973	0.999
Rv3153	Rv3150	0.906	0.147	0.531	0	0.796	0.725	0.959	0.884	0.999
Rv3158	Rv3152	0.963	0.002	0.765	0	0.707	0.484	0.901	0.964	0.999
Rv3153	Rv3146	0.906	0.147	0.444	0	0.791	0.659	0.947	0.788	0.999
Rv3156	Rv3150	0.901	0	0	0	0.732	0	0.956	0.818	0.999
Rv3155	Rv3149	0.906	0	0	0	0.684	0	0.9	0.82	0.999
Rv3157	Rv3148	0.901	0	0.637	0	0.623	0.408	0.938	0.939	0.999
Rv3154	Rv3152	0.971	0	0	0	0.425	0.518	0.9	0.962	0.999
Rv3153	Rv3147	0.906	0	0.735	0	0.776	0.712	0.94	0.926	0.999
Rv3156	Rv3153	0.963	0.216	0.166	0	0.744	0	0.952	0.965	0.999
Rv3155	Rv3148	0.906	0	0.403	0	0.626	0.795	0.9	0.916	0.999
Rv3156	Rv3149	0.901	0	0	0	0.54	0	0.9	0.911	0.999
Rv3158	Rv3157	0.971	0	0.766	0.586	0.568	0.419	0.9	0.922	0.999
Rv2937	Rv2936	0.896	0	0.765	0	0	0	0.9	0.886	0.999
Rv3155	Rv3147	0.906	0	0.408	0	0.252	0	0.9	0.923	0.999
Rv3150	Rv3147	0.971	0	0.247	0	0.743	0.577	0.943	0.84	0.999
Rv3158	Rv3150	0.901	0	0	0	0.674	0	0.902	0.869	0.999
Rv3154	Rv3150	0.906	0	0	0	0.408	0	0.9	0.857	0.999
Rv3157	Rv3153	0.963	0	0	0	0.665	0	0.936	0.921	0.999
Rv3155	Rv3153	0.971	0.251	0	0	0.772	0	0.9	0.964	0.999
Rv3152	Rv3148	0.906	0	0.697	0	0.732	0.789	0.958	0.963	0.999
Rv3157	Rv3150	0.901	0	0	0	0.688	0	0.939	0.75	0.999
Rv3153	Rv3152	0.971	0.786	0.176	0	0.769	0	0.955	0.964	0.999
Rv3156	Rv3155	0.963	0.565	0.376	0	0.778	0.624	0.9	0.96	0.999
Rv3157	Rv3146	0.901	0	0	0	0.244	0	0.931	0.752	0.998
Rv3154	Rv3149	0.906	0	0	0	0.253	0	0.9	0.855	0.998
Rv3156	Rv3146	0.901	0	0	0	0.438	0	0.944	0.711	0.998
Rv3154	Rv3147	0.906	0	0	0	0	0.435	0.9	0.822	0.998
Rv0637	Rv0636	0.954	0.174	0.682	0	0	0	0	0.889	0.998
Rv0930	Rv0820	0.799	0	0.766	0	0.165	0	0.8	0.856	0.998
Rv0936	Rv0820	0.79	0	0.766	0	0.095	0	0.8	0.856	0.998
Rv3158	Rv3149	0.901	0	0	0	0.489	0	0.9	0.817	0.998
Rv3285	Rv3280	0.766	0.093	0	0	0.101	0.064	0.9	0.912	0.997
Rv3158	Rv3146	0.901	0	0	0	0.249	0	0.9	0.76	0.997
Rv3324c	Rv3323c	0.925	0	0	0	0	0	0.9	0.738	0.997
Rv3002c	Rv2995c	0.8	0	0	0	0.296	0	0.9	0.788	0.996
Rv3154	Rv3146	0.906	0	0	0	0.224	0	0.9	0.566	0.996
Rv3457c	Rv0710	0.8	0	0.3	0	0.776	0.42	0	0.802	0.995
Rv0070c	Rv0069c	0.912	0	0	0	0	0	0.9	0.461	0.994
Rv3266c	Rv3265c	0.961	0	0.338	0	0	0	0	0.773	0.993
Rv3457c	Rv0652	0.75	0	0	0	0.784	0.11	0	0.889	0.993
Rv2938	Rv2937	0.865	0	0.726	0.632	0	0	0.9	0.841	0.992
Rv0710	Rv0652	0.751	0	0	0	0.79	0	0	0.831	0.99
Rv2947c	Rv2946c	0.865	0.101	0.745	0	0	0	0	0.65	0.986
Rv3323c	Rv3206c	0.293	0	0	0	0	0.084	0.8	0.894	0.983
Rv3324c	Rv3119	0.625	0	0	0	0.132	0	0.9	0.515	0.98
Rv3457c	Rv1080c	0.605	0	0.289	0	0.236	0.482	0	0.799	0.971
Rv2938	Rv2930	0.816	0	0	0	0	0	0	0.838	0.968
Rv3340	Rv3248c	0.148	0	0	0	0.072	0.355	0.9	0.302	0.953
Rv3268	Rv3267	0.718	0	0	0	0	0	0	0.843	0.952
Rv3309c	Rv0070c	0.764	0	0	0	0.274	0	0	0.753	0.952
Rv3301c	Rv0820	0.78	0	0.511	0	0	0	0	0.592	0.95
Rv1826	Rv0070c	0.695	0	0	0	0.336	0	0	0.776	0.948
Rv3206c	Rv3119	0.486	0	0	0	0	0.117	0.8	0.528	0.947
Rv3321c	Rv3320c	0.92	0	0	0	0	0	0	0.353	0.945
Rv2936	Rv2930	0.816	0	0	0	0	0	0	0.695	0.94
Rv3457c	Rv3100c	0.731	0	0	0	0	0	0	0.784	0.938
Rv3616c	Rv3615c	0.63	0	0	0	0	0	0	0.843	0.938
Rv3284	Rv3283	0.91	0	0.334	0	0	0	0	0	0.936
Rv3152	Rv3043c	0	0	0.581	0	0.532	0	0	0.71	0.935
Rv3302c	Rv3301c	0.573	0	0	0	0	0	0	0.854	0.933
Rv0652	Rv0055	0	0	0	0	0.548	0.411	0	0.779	0.933
Rv1935c	Rv1467c	0	0	0	0	0	0	0.9	0.357	0.931
Rv3615c	Rv3614c	0.562	0	0	0	0	0	0	0.845	0.927
Rv3241c	Rv3240c	0.869	0	0	0	0	0	0	0.45	0.923
Rv3240c	Rv0638	0	0	0	0	0	0	0.9	0.284	0.923
Rv3301c	Rv0930	0.798	0	0	0	0	0	0	0.645	0.923
Rv3206c	Rv3117	0.164	0	0	0	0	0	0.8	0.588	0.921
Rv0710	Rv0055	0.12	0	0	0	0.466	0.368	0	0.776	0.919
Rv3156	Rv3043c	0	0	0.361	0	0.556	0	0	0.728	0.912
Rv2939	Rv2938	0.694	0	0.182	0	0	0	0	0.692	0.912
Rv2939	Rv2936	0.694	0	0	0	0	0	0	0.725	0.91
Rv3323c	Rv3119	0.104	0	0.766	0.956	0	0	0.9	0.734	0.91
Rv3200c	Rv3199c	0.663	0.75	0	0	0	0	0	0	0.91
Rv3616c	Rv3614c	0.425	0	0	0	0	0	0	0.846	0.905
Rv3336c	Rv0070c	0.317	0	0	0	0.093	0	0	0.861	0.902
Rv3274c	Rv1935c	0	0	0	0	0	0	0.9	0	0.899
Rv2428	Rv1854c	0	0	0	0	0.096	0	0	0.895	0.899
Rv3034c	Rv1935c	0	0	0	0	0	0	0.9	0	0.899
Rv3301c	Rv0936	0.788	0	0	0	0	0	0	0.55	0.898
Rv3043c	Rv1623c	0	0	0	0	0	0	0	0.895	0.895
Rv3121	Rv3119	0.419	0	0	0	0	0	0	0.832	0.895
Rv2937	Rv2930	0.816	0	0	0	0	0	0	0.441	0.89
Rv3034c	Rv3031	0	0	0	0	0	0	0	0.889	0.889
Rv2939	Rv2930	0.656	0	0	0	0	0	0	0.656	0.874
Rv3282	Rv3280	0.869	0	0	0	0	0	0	0	0.87
Rv3223c	Rv3222c	0.865	0	0	0	0	0	0	0	0.865
Rv3101c	Rv3100c	0.865	0	0	0	0	0	0	0	0.865
Rv1826	Rv0069c	0.676	0	0	0	0	0	0	0.6	0.861
Rv3283	Rv3206c	0.13	0	0	0	0	0	0.8	0.294	0.86
Rv3119	Rv3117	0.783	0	0	0	0	0	0	0.39	0.858
Rv3240c	Rv3100c	0.57	0	0.517	0	0	0.096	0	0.354	0.852
Rv3260c	Rv3258c	0.163	0	0	0	0	0	0	0.834	0.851
Rv3457c	Rv0055	0.117	0	0	0	0.664	0	0	0.554	0.849
Rv3413c	Rv3222c	0	0	0	0	0	0	0	0.847	0.847
Rv3614c	Rv3613c	0.585	0	0	0	0	0	0	0.653	0.846
Rv3320c	Rv2010	0	0	0	0	0	0	0	0.844	0.843
Rv0936	Rv0930	0.72	0	0.766	0.713	0.072	0	0	0.905	0.838
Rv2817c	Rv2081c	0	0	0	0	0	0	0	0.836	0.835
Rv3148	Rv3043c	0	0	0	0	0.345	0	0	0.759	0.831
Rv3340	Rv2050	0	0	0	0	0	0	0	0.831	0.831
Rv3100c	Rv0652	0.108	0	0	0	0	0	0	0.821	0.83
Rv3457c	Rv3240c	0.214	0	0	0	0	0	0	0.798	0.83
Rv3121	Rv3117	0.387	0	0	0	0	0	0	0.726	0.82
Rv3219	Rv3218	0.44	0	0	0	0	0	0	0.699	0.82
Rv3215	Rv1885c	0	0	0	0	0	0	0.8	0.12	0.812
Rv3100c	Rv0710	0.284	0	0	0	0	0.668	0	0.279	0.805
Rv1854c	Rv1623c	0.292	0	0	0	0	0	0	0.742	0.805
Rv0652	Rv0070c	0	0	0	0	0.221	0	0	0.762	0.802
Rv3616c	Rv3613c	0.314	0	0	0	0	0	0	0.729	0.801
Rv3221c	Rv3220c	0.8	0	0	0	0	0	0	0	0.8
Rv3457c	Rv3324c	0	0	0	0	0	0	0.8	0	0.8

## Sheet: Blue
Table S6. Co-expressed connections in agreement with the STRING database
node1_external_id	node2_external_id	neighborhood	fusion	cooccurence	homology	coexpression	experimental	knowledge	textmining	combined_score
Rv1310	Rv1304	0.873	0	0.565	0	0.504	0.709	0.9	0.966	0.999
Rv1305	Rv1304	0.933	0.156	0	0	0.458	0	0.9	0.934	0.999
Rv0018c	Rv0014c	0.937	0.027	0.753	0	0	0	0	0.915	0.998
Rv1310	Rv1305	0.887	0.003	0	0	0	0	0.9	0.86	0.998
Rv0018c	Rv0016c	0.916	0	0	0	0	0	0	0.966	0.997
Rv0016c	Rv0014c	0.891	0	0	0	0	0	0	0.967	0.996
Rv0693	Rv0692	0.865	0	0.756	0	0	0	0	0.843	0.994
Rv2347c	Rv2346c	0.683	0	0	0	0	0.9	0	0.848	0.994
Rv3230c	Rv3229c	0.843	0	0.744	0	0	0	0	0.877	0.994
Rv2221c	Rv2220	0.208	0	0.743	0	0	0	0	0.937	0.985
Rv2204c	Rv1464	0.77	0	0	0	0	0	0	0.867	0.967
Rv0243	Rv0241c	0.841	0	0.759	0	0	0	0	0	0.959
Rv2476c	Rv2220	0	0	0	0	0	0	0.9	0.513	0.948
Rv1300	Rv1298	0.914	0	0	0	0	0	0	0.309	0.937
Rv0692	Rv0690c	0.602	0	0	0	0	0	0	0.843	0.933
Rv1845c	Rv1312	0	0	0.373	0	0	0	0	0.888	0.925
Rv3408	Rv3407	0.865	0	0	0	0	0	0	0.466	0.923
Rv3581c	Rv3579c	0.913	0	0	0	0	0	0	0	0.914
Rv1018c	Rv0014c	0	0	0	0	0	0	0	0.908	0.908
Rv0526	Rv0524	0.809	0	0	0	0	0	0	0.422	0.882
Rv0197	Rv0196	0.88	0	0	0	0	0	0	0	0.881
Rv1436	Rv1310	0.148	0	0	0	0.435	0	0	0.775	0.877
Rv2394	Rv2220	0	0	0	0	0	0	0.8	0.4	0.872
Rv1310	Rv1018c	0.751	0	0	0	0	0	0	0.498	0.866
Rv2780	Rv1559	0.539	0	0	0	0	0	0	0.722	0.863
Rv1074c	Rv0243	0	0	0.739	0.673	0.122	0	0.8	0.129	0.86
Rv2783c	Rv1436	0.412	0	0	0	0.073	0	0	0.769	0.857
Rv0859	Rv0243	0	0	0.666	0.667	0.108	0	0.8	0.119	0.853
Rv0528	Rv0526	0.738	0	0	0	0	0	0	0.427	0.839
Rv1074c	Rv0859	0	0	0.766	0.839	0.084	0	0.8	0.254	0.833
Rv2783c	Rv1310	0.379	0	0	0	0.176	0	0	0.712	0.832
Rv1436	Rv1008	0.287	0	0	0	0	0	0	0.768	0.823
Rv2220	Rv1310	0	0	0	0	0.087	0	0	0.814	0.819
Rv2780	Rv2220	0	0	0	0	0	0	0	0.816	0.816
Rv2157c	Rv0016c	0.389	0	0.71	0	0	0	0	0.07	0.812
Rv1008	Rv0823c	0.596	0	0.16	0	0.074	0	0	0.491	0.806
Rv2476c	Rv2394	0	0	0	0	0	0	0.8	0	0.8

## Sheet: Red
Table S6. Co-expressed connections in agreement with the STRING database
node1_external_id	node2_external_id	neighborhood	fusion	cooccurence	homology	coexpression	experimental	knowledge	textmining	combined_score
Rv0705	Rv0703	0.893	0	0	0	0.795	0	0	0.964	0.999
Rv3459c	Rv0705	0.8	0	0	0	0.793	0.786	0	0.963	0.999
Rv1164	Rv1163	0.97	0.19	0.766	0	0.167	0	0.9	0.959	0.999
Rv3020c	Rv3019c	0.731	0	0	0	0	0.908	0	0.846	0.995
Rv3459c	Rv0703	0.8	0	0	0	0.791	0	0	0.846	0.992
Rv2442c	Rv0703	0.114	0	0	0	0.707	0.798	0	0.839	0.989
Rv2442c	Rv2057c	0	0	0	0	0.716	0.803	0	0.813	0.988
Rv3459c	Rv0053	0	0	0	0	0.74	0.775	0	0.812	0.987
Rv0705	Rv0053	0	0	0	0	0.688	0.776	0	0.813	0.985
Rv2057c	Rv0703	0	0	0	0	0.69	0.8	0	0.774	0.984
Rv0139	Rv0138	0.865	0	0	0	0	0	0	0.842	0.977
Rv1794	Rv1787	0	0	0.756	0	0	0	0	0.843	0.959
Rv2442c	Rv0053	0	0	0	0	0.78	0	0	0.816	0.957
Rv3680	Rv3679	0.923	0	0.766	0.465	0	0	0	0	0.954
Rv3085	Rv3084	0.865	0	0	0	0	0	0	0.678	0.953
Rv3459c	Rv2442c	0.11	0	0	0	0.762	0	0	0.808	0.953
Rv3089	Rv3087	0.865	0	0	0	0	0	0	0.67	0.952
Rv0284	Rv0283	0.865	0	0.213	0	0	0	0	0.603	0.952
Rv0289	Rv0288	0.827	0	0.722	0	0	0	0	0.088	0.95
Rv2442c	Rv0705	0.206	0	0	0	0.677	0	0	0.826	0.949
Rv0168	Rv0167	0.865	0	0.766	0.582	0	0	0	0.848	0.94
Rv0284	Rv0282	0.865	0	0	0	0	0	0	0.531	0.932
Rv0703	Rv0053	0	0	0	0	0.709	0	0	0.78	0.931
Rv0283	Rv0282	0.865	0	0	0	0	0	0	0.483	0.925
Rv1292	Rv0053	0.46	0	0	0	0.523	0	0	0.727	0.92
Rv3459c	Rv2057c	0	0	0	0	0.709	0	0	0.704	0.908
Rv3459c	Rv1292	0.419	0	0	0	0.418	0	0	0.758	0.907
Rv3048c	Rv1981c	0	0	0.766	0.959	0	0	0.9	0.848	0.906
Rv2057c	Rv0705	0	0	0	0	0.632	0	0	0.76	0.905
Rv3087	Rv3085	0.624	0	0	0	0	0	0	0.738	0.895
Rv3087	Rv3084	0.624	0	0	0	0	0	0	0.723	0.889
Rv1788	Rv1787	0.62	0	0	0	0	0	0	0.723	0.887
Rv2061c	Rv2060	0	0	0	0	0	0	0	0.887	0.887
Rv3020c	Rv0288	0.136	0	0	0	0	0.252	0	0.841	0.883
Rv0593	Rv0591	0.865	0	0.231	0.433	0	0	0	0	0.879
Rv0593	Rv0592	0.865	0	0.192	0.407	0	0	0	0	0.876
Rv3089	Rv3085	0.624	0.001	0	0	0	0	0	0.683	0.873
Rv0592	Rv0591	0.865	0	0	0.422	0	0	0	0	0.865
Rv1794	Rv1791	0.071	0	0	0	0	0	0	0.856	0.857
Rv3619c	Rv1038c	0	0	0	0	0	0	0	0.843	0.843
Rv0289	Rv0284	0.576	0	0.177	0	0	0	0	0.601	0.841
Rv2057c	Rv0053	0	0	0	0	0.643	0	0	0.578	0.839
Rv3019c	Rv1038c	0	0	0	0	0	0	0	0.84	0.839
Rv0558	Rv0557	0.838	0	0	0	0	0	0	0	0.838
Rv3619c	Rv3019c	0	0	0	0	0	0	0	0.831	0.831
Rv3619c	Rv0288	0	0	0	0	0	0	0	0.83	0.829
Rv1292	Rv0705	0.225	0	0	0	0.182	0	0	0.75	0.82
Rv1093	Rv0053	0.284	0	0	0	0.148	0	0	0.74	0.819
Rv3089	Rv3084	0.624	0	0	0	0	0	0	0.534	0.813
Rv0288	Rv0284	0.6	0	0.499	0	0	0	0	0.17	0.81
Rv0288	Rv0282	0.6	0	0	0	0	0	0	0.533	0.8

## Sheet: Black
Table S6. Co-expressed connections in agreement with the STRING database
node1_external_id	node2_external_id	neighborhood	fusion	cooccurence	homology	coexpression	experimental	knowledge	textmining	combined_score
Rv2350c	Rv2349c	0.613	0	0.766	0.956	0	0	0.9	0.866	0.961
Rv2494	Rv2493	0.898	0	0	0	0	0	0	0	0.898
Rv3889c	Rv3888c	0.594	0	0.721	0	0	0	0	0	0.879
Rv3326	Rv3325	0.865	0.002	0	0	0	0	0	0	0.865
Rv2279	Rv2278	0.865	0.002	0	0	0	0	0	0	0.865
Rv0796	Rv0795	0.865	0.002	0	0	0	0	0	0	0.865
Rv2355	Rv2354	0.865	0.002	0	0	0	0	0	0	0.865
Rv3185	Rv3184	0.865	0.002	0	0	0	0	0	0	0.865
Rv2106	Rv2105	0.865	0.002	0	0	0	0	0	0	0.865
