# Supplementary material for: Integrated gene co-expression network analysis in the growth phase of Mycobacterium tuberculosis reveals new potential drug targets
Source: Royal Society of Chemistry journal article supplement (doi:10.1039/c3mb70278b), 2013-08-14
Supplement: c3mb70278b_2.xlsx [file c3mb70278b_2.xlsx]

## Sheet: Sheet1
Table S8. List of hub genes in the co-expressed modules sorted in descending order of linear of sum of modified z-scores of three criteria
Rv IDs	Gene Symbols	Functional annotation	Kwithin	Kextracted	PCC	Abs PCC	P-value	Modififed Z score of kwithin	Modififed Z score of kextracted	Modififed Z score of PCC with Mes	Score (row some of each criteria)	Module
Rv1611	trpC	Probable indole-3-glycerol phosphate synthase TrpC	14.71	156	0.940005	0.940005	0	2.33215	3.92242	0.819506	7.07408	Turquoise
Rv1596	nadC	Probable nicotinate-nucleotide pyrophosphatase NadC	11.73	112	0.948279	0.948279	0	1.69074	2.38147	0.910563	4.98278	Turquoise
Rv0545c	pitA	Probable low-affinity inorganic phosphate transporter integral membrane protein PitA	12.43	107	0.946288	0.946288	0	1.84141	2.20636	0.910563	4.95834	Turquoise
Rv3404c	Rv3404c	Conserved hypothetical protein	10.77	88	0.909058	0.909058	2.88658e-15	1.48412	1.54095	0.546338	3.57141	Turquoise
Rv1308	atpA	Probable ATP synthase alpha chain AtpA	5.06	109	0.902523	0.902523	9.76996e-15	0.255111	2.27641	0.455281	2.9868	Turquoise
Rv0015c	pknA	Transmembrane serine/threonine-protein kinase A PknA (protein kinase A) (STPK A)	8.98	69	0.931539	0.931539	0	1.09884	0.875541	0.72845	2.70283	Turquoise
Rv0996	Rv0996	Probable conserved transmembrane protein	8.85	79	0.89233	0.89233	5.37348e-14	1.07086	1.22576	0.364225	2.66084	Turquoise
Rv0777	purB	Probable adenylosuccinate lyase PurB (adenylosuccinase) (ASL) (ASASE)	7.87	65	0.896408	0.896408	2.77556e-14	0.859927	0.735454	0.455281	2.05066	Turquoise
Rv2106	Rv2106	Probable transposase	10.15	32	0.974473	0.974473	0	1.35067	-0.42026	1.09268	2.02308	Black
Rv0796	Rv0796	Putative transposase for insertion sequence element IS6110	9.27	31	0.967037	0.967037	0	1.16126	-0.455281	1.09268	1.79865	Black
Rv3326	Rv3326	Probable transposase	9.66	31	0.963821	0.963821	0	1.2452	-0.455281	1.00162	1.79154	Black
Rv1756c	Rv1756c	Putative transposase	9.52	31	0.95881	0.95881	0	1.21507	-0.455281	1.00162	1.76141	Black
Rv2649	Rv2649	Probable transposase for insertion sequence element IS6110	9.48	31	0.962691	0.962691	0	1.20646	-0.455281	1.00162	1.7528	Black
Rv2479c	Rv2479c	Probable transposase	9.38	31	0.955457	0.955457	0	1.18494	-0.455281	1.00162	1.73127	Black
Rv2167c	Rv2167c	Probable transposase	9.05	31	0.957758	0.957758	0	1.11391	-0.455281	1.00162	1.66025	Black
Rv1613	trpA	Probable tryptophan synthase	5.23	75	0.882913	0.882913	2.24709e-13	0.291701	1.08567	0.273169	1.65054	Turquoise
Rv1369c	Rv1369c	Probable transposase	8.88	31	0.959865	0.959865	0	1.07732	-0.455281	1.00162	1.62365	Black
Rv3028c	fixB	Probable electron transfer flavoprotein (alpha-subunit) FixB (alpha-ETF) (electron transfer flavoprotein large subunit) (ETFLS)	6.34	58	0.896932	0.896932	2.55351e-14	0.530614	0.490303	0.455281	1.4762	Turquoise
Rv3380c	Rv3380c	Probable transposase	7.7	31	0.953119	0.953119	0	0.823337	-0.455281	0.910563	1.27862	Black
Rv2814c	Rv2814c	Probable transposase	7.89	31	0.936593	0.936593	0	0.864232	-0.455281	0.819506	1.22846	Black
Rv3155	nuoK	Probable NADH dehydrogenase I (chain K) NuoK (NADH-ubiquinone oxidoreductase chain K)	3.96	65	0.895265	0.895265	3.35287e-14	0.0183495	0.735454	0.455281	1.20909	Brown
Rv3280	accD5	Probable propionyl-CoA carboxylase beta chain 5 AccD5 (pccase) (propanoyl-CoA:carbon dioxide ligase)	5.99	57	0.881474	0.881474	2.76668e-13	0.455281	0.455281	0.273169	1.18373	Brown
Rv2279	Rv2279	Probable transposase	7.4	31	0.927139	0.927139	0	0.758766	-0.455281	0.72845	1.03193	Black
Rv3153	nuoI	Probable NADH dehydrogenase I (chain I) NuoI (NADH-ubiquinone oxidoreductase chain I)	4.87	66	0.849063	0.849063	1.62546e-11	0.214215	0.770476	0	0.984691	Brown
Rv3458c	rpsD	30S ribosomal protein S4 RpsD	2.47	80	0.847926	0.847926	1.84228e-11	-0.302354	1.26078	0	0.958425	Turquoise
Rv3146	nuoB	Probable NADH dehydrogenase I (chain B) NuoB (NADH-ubiquinone oxidoreductase chain B)	3.83	71	0.847096	0.847096	2.01736e-11	-0.00963138	0.945584	0	0.935953	Brown
Rv3148	nuoD	Probable NADH dehydrogenase I (chain D) NuoD (NADH-ubiquinone oxidoreductase chain D)	4.33	72	0.829135	0.829135	1.27429e-10	0.0979873	0.980606	-0.182113	0.896481	Brown
Rv3157	nuoM	Probable NADH dehydrogenase I (chain M) NUOK (NADH-ubiquinone oxidoreductase chain M)	4.22	64	0.846974	0.846974	2.04443e-11	0.0743112	0.700433	0	0.774744	Brown
Rv1764	Rv1764	Putative transposase	6.45	31	0.920491	0.920491	2.22045e-16	0.55429	-0.455281	0.637394	0.736403	Black
Rv0651	rplJ	50S ribosomal protein L10 RplJ	2.24	81	0.816186	0.816186	4.2376e-10	-0.351859	1.2958	-0.273169	0.670773	Turquoise
Rv3029c	fixA	Probable electron transfer flavoprotein (beta-subunit) FixA (beta-ETF) (electron transfer flavoprotein small subunit) (ETFSS)	5.5	49	0.863886	0.863886	2.87281e-12	0.349815	0.175108	0.0910563	0.615979	Turquoise
Rv1307	atpH	Probable ATP synthase delta chain AtpH	1.41	87	0.795515	0.795515	2.40447e-09	-0.530506	1.50593	-0.455281	0.520143	Turquoise
Rv2278	Rv2278	Putative transposase for insertion sequence element IS6110 (fragment)	5.52	30	0.917103	0.917103	6.66134e-16	0.35412	-0.490303	0.637394	0.501211	Black
Rv3152	nuoH	Probable NADH dehydrogenase I (chain H) NuoH (NADH-ubiquinone oxidoreductase chain H)	4.5	67	0.804703	0.804703	1.14006e-09	0.134578	0.805498	-0.455281	0.484794	Brown
Rv3187	Rv3187	Probable transposase	5.93	29	0.912258	0.912258	1.55431e-15	0.442367	-0.525325	0.546338	0.46338	Black
Rv3680	Rv3680	Probable anion transporter ATPase	3.87475	33	-0.941016	0.941016	1.59775e-18	0	-0.385238	0.819506	0.434268	Red
Rv3417c	groEL1	60 kDa chaperonin 1 GroEL1 (protein CPN60-1) (GroEL protein 1)	1.53	88	0.775496	0.775496	1.08064e-08	-0.504677	1.54095	-0.637394	0.398881	Turquoise
Rv0132c	fgd2	Putative F420-dependent glucose-6-phosphate dehydrogenase Fgd2	5.17	39	0.88095	0.88095	2.98206e-13	0.278787	-0.175108	0.273169	0.376847	Turquoise
Rv1885c	Rv1885c	Chorismate mutase	1.55	71	0.844153	0.844153	2.77198e-11	-0.500373	0.945584	-0.0910563	0.354155	Brown
Rv3268	Rv3268	Conserved hypothetical protein	3.55	55	0.84917	0.84917	1.60636e-11	-0.0698978	0.385238	0	0.31534	Brown
Rv2815c	Rv2815c	Probable transposase	5.23	29	0.907341	0.907341	3.9968e-15	0.291701	-0.525325	0.546338	0.312714	Black
Rv3185	Rv3185	Probable transposase	5.64	29	0.899805	0.899805	1.57652e-14	0.379948	-0.525325	0.455281	0.309905	Black
Rv2355	Rv2355	Probable transposase	5.58	29	0.904974	0.904974	6.21725e-15	0.367034	-0.525325	0.455281	0.296991	Black
Rv1451	ctaB	Probable cytochrome C oxidase assembly factor CtaB	4.8	36	0.893467	0.893467	4.4853e-14	0.199149	-0.280173	0.364225	0.283201	Turquoise
Rv1437	pgk	Probable phosphoglycerate kinase Pgk	3.14	54	0.860314	0.860314	4.44134e-12	-0.158145	0.350216	0.0910563	0.283127	Turquoise
Rv2986c	hupB	DNA-binding protein HU homolog HupB (histone-like protein) (HLP) (21-kDa laminin-2-binding protein)	2.07	83	0.770371	0.770371	1.5495e-08	-0.388449	1.36584	-0.72845	0.248945	Turquoise
Rv2846c	efpA	Possible integral membrane efflux protein EfpA	1.64	62	0.856844	0.856844	6.70419e-12	-0.481001	0.630389	0.0910563	0.240445	Turquoise
Rv0509	hemA	Probable glutamyl-tRNA reductase HemA (GLUTR)	4.65	34	0.891661	0.891661	1.34115e-13	0.166863	-0.350216	0.364225	0.180872	Turquoise
Rv3150	nuoF	Probable NADH dehydrogenase I (chain F) NuoF (NADH-ubiquinone oxidoreductase chain F)	3.34	68	0.786014	0.786014	5.00483e-09	-0.115098	0.840519	-0.546338	0.179084	Brown
Rv3278c	Rv3278c	Probable conserved transmembrane protein	5.18	33	0.862409	0.862409	3.44502e-12	0.280939	-0.385238	0.0910563	-0.0132427	Brown
Rv3277	Rv3277	Probable conserved transmembrane protein	5.29	31	0.862474	0.862474	3.41771e-12	0.304615	-0.455281	0.0910563	-0.0596099	Brown
Rv1942c	mazF5	Possible toxin MazF5	3.23	51	0.826304	0.826304	1.67117e-10	-0.138774	0.245151	-0.182113	-0.0757348	Turquoise
Rv3197	Rv3197	Probable conserved ATP-binding protein ABC transporter	2.52	50	0.845117	0.845117	2.49964e-11	-0.291592	0.21013	0	-0.0814625	Brown
Rv3221c	TB7.3	Biotinylated protein TB7.3	4.47	32	0.866491	0.866491	2.07478e-12	0.128121	-0.42026	0.182113	-0.110027	Brown
Rv0795	Rv0795	Putative transposase for insertion sequence element IS6110 (fragment)	4.19	28	0.889331	0.889331	8.61533e-14	0.0678541	-0.560346	0.364225	-0.128267	Black
Rv2457c	clpX	Probable ATP-dependent CLP protease ATP-binding subunit ClpX	2.39	57	0.816631	0.816631	4.07279e-10	-0.319573	0.455281	-0.273169	-0.137461	Turquoise
Rv1610	Rv1610	Possible conserved membrane protein	2.69	67	0.76979	0.76979	1.61313e-08	-0.255002	0.805498	-0.72845	-0.177954	Turquoise
Rv0057	Rv0057	Hypothetical protein	1.74	66	0.778548	0.778548	8.68096e-09	-0.459477	0.770476	-0.637394	-0.326395	Brown
Rv0668	rpoC	DNA-directed RNA polymerase (beta' chain) RpoC (transcriptase beta' chain) (RNA polymerase beta' subunit).	1.75	57	0.805095	0.805095	1.10343e-09	-0.457325	0.455281	-0.364225	-0.366269	Turquoise
Rv3158	nuoN	Probable NADH dehydrogenase I (chain N) NuoN (NADH-ubiquinone oxidoreductase chain N)	3.27	63	0.751014	0.751014	5.58519e-08	-0.130164	0.665411	-0.910563	-0.375316	Brown
Rv2996c	serA1	Probable D-3-phosphoglycerate dehydrogenase SerA1 (PGDH)	3.73	33	0.850219	0.850219	2.75289e-11	-0.0311551	-0.385238	0	-0.416393	Turquoise
Rv1182	papA3	Probable conserved polyketide synthase associated protein PapA3	1.3	71	-0.757415	0.757415	3.70338e-08	-0.554182	0.945584	-0.819506	-0.428104	Turquoise
Rv3592	mhuD	Possible heme degrading protein MhuD	1.5	48	0.835173	0.835173	7.02876e-11	-0.511134	0.140087	-0.0910563	-0.462104	Turquoise
Rv3223c	sigH	Alternative RNA polymerase sigma-E factor (sigma-24) SigH (RPOE)	3.96	33	0.831389	0.831389	1.02327e-10	0.0183495	-0.385238	-0.182113	-0.549001	Brown
Rv2839c	infB	Probable translation initiation factor if-2 InfB	2.86	34	0.851596	0.851596	1.22502e-11	-0.218412	-0.350216	0	-0.568628	Turquoise
Rv1340	rphA	Probable ribonuclease RphA (RNase PH) (tRNA nucleotidyltransferase)	4.25	28	0.835524	0.835524	1.25164e-10	0.0807683	-0.560346	-0.0910563	-0.570634	Turquoise
Rv0145	Rv0145	Possible S-adenosylmethionine-dependent methyltransferase	1.11	50	0.817113	0.817113	3.90051e-10	-0.595077	0.21013	-0.273169	-0.658116	Turquoise
Rv0984	moaB2	Possible pterin-4-alpha-carbinolamine dehydratase MoaB2 (PHS) (4-alpha- hydroxy-tetrahydropterin dehydratase) (pterin-4-a-carbinolamine dehydratase) (phenylalanine hydroxylase-stimulating protein) (PHS) (pterin carbinolamine dehydratase) (PCD)	0.77	65	0.774778	0.774778	1.13731e-08	-0.668258	0.735454	-0.72845	-0.661253	Turquoise
Rv1240	mdh	Probable malate dehydrogenase Mdh	1.98	40	0.82837	0.82837	1.37177e-10	-0.40782	-0.140087	-0.182113	-0.730019	Turquoise
Rv1183	mmpL10	Probable conserved transmembrane transport protein MmpL10	1.29	58	-0.766095	0.766095	3.27747e-08	-0.556334	0.490303	-0.72845	-0.794481	Turquoise
Rv3240c	secA1	Probable preprotein translocase SecA1 1 subunit	4.24	29	0.811958	0.811958	6.14848e-10	0.0786159	-0.525325	-0.364225	-0.810934	Brown
Rv3141	fadB4	Probable NADPH quinone oxidoreductase FadB4 (NADPH:quinone reductase) (zeta-crystallin)	1.96	35	0.837324	0.837324	5.65319e-11	-0.412125	-0.315195	-0.0910563	-0.818376	Brown
Rv1711	Rv1711	Conserved hypothetical protein	1.63	44	0.80537	0.80537	1.07829e-09	-0.483154	0	-0.364225	-0.847379	Turquoise
Rv3457c	rpoA	Probable DNA-directed RNA polymerase (alpha chain) RpoA (transcriptase alpha chain) (RNA polymerase alpha subunit) (DNA-directed RNA nucleotidyltransferase)	0.99	54	0.780571	0.780571	7.49286e-09	-0.620905	0.350216	-0.637394	-0.908083	Brown
Rv0462	lpdC	Dihydrolipoamide dehydrogenase LpdC (lipoamide reductase (NADH)) (lipoyl dehydrogenase) (dihydrolipoyl dehydrogenase) (diaphorase)	1.95	31	0.840234	0.840234	4.18929e-11	-0.414278	-0.455281	-0.0910563	-0.960615	Turquoise
Rv2889c	tsf	Probable elongation factor Tsf (EF-ts)	1.44	31	0.85275	0.85275	1.07514e-11	-0.524049	-0.455281	0	-0.97933	Turquoise
Rv0637	hadC	(3R)-hydroxyacyl-ACP dehydratase subunit HadC	0.83	46	0.800132	0.800132	1.66053e-09	-0.655343	0.0700433	-0.455281	-1.04058	Brown
Rv3250c	rubB	Probable rubredoxin RubB	2	44	-0.757226	0.757226	3.7492e-08	-0.403516	0	-0.819506	-1.22302	Turquoise
Rv2883c	pyrH	Probable uridylate kinase PyrH (UK) (uridine monophosphate kinase) (UMP kinase)	2.03	30	0.812186	0.812186	6.02771e-10	-0.397059	-0.490303	-0.364225	-1.25159	Turquoise
Rv3862c	whiB6	Possible transcriptional regulatory protein WhiB-like WhiB6	1.40622	31	-0.815425	0.815425	4.53429e-10	-0.53132	-0.455281	-0.273169	-1.25977	Blue
Rv1615	Rv1615	Probable membrane protein	0.91	33	0.82146	0.82146	2.628e-10	-0.638124	-0.385238	-0.273169	-1.29653	Brown
Rv0249c	Rv0249c	Probable succinate dehydrogenase [membrane anchor subunit] (succinic dehydrogenase)	1.02	45	0.769765	0.769765	1.61597e-08	-0.614448	0.0350216	-0.72845	-1.30788	Brown
Rv2890c	rpsB	30S ribosomal protein S2 RpsB	2.29	29	0.801748	0.801748	1.45551e-09	-0.341097	-0.525325	-0.455281	-1.3217	Turquoise
Rv0007	Rv0007	Possible conserved membrane protein	0.720256	30	0.805132	0.805132	1.09996e-09	-0.678964	-0.490303	-0.364225	-1.53349	Blue
Rv2392	cysH	Probable 3'-phosphoadenosine 5'-phosphosulfate reductase CysH (PAPS reductase	0.838151	42	0.755051	0.755051	4.31656e-08	-0.653589	-0.0700433	-0.819506	-1.54314	Blue
Rv1595	nadB	Probable L-aspartate oxidase NadB	1.32	28	0.803411	0.803411	1.2692e-09	-0.549877	-0.560346	-0.455281	-1.5655	Turquoise
Rv3582c	ispD	4-diphosphocytidyl-2C-methyl-D-erythritol synthase IspD (MEP cytidylyltransferase) (MCT)	0.97	35	0.746346	0.746346	7.47918e-08	-0.62521	-0.315195	-0.910563	-1.85097	Turquoise
Rv3856c	Rv3856c	Conserved hypothetical protein	1.17	28	0.762307	0.762307	2.68233e-08	-0.582163	-0.560346	-0.819506	-1.96202	Turquoise
Rv2902c	rnhB	Probable ribonuclease HII protein RnhB (RNase HII)	0.78	30	0.748248	0.748248	6.64539e-08	-0.666105	-0.490303	-0.910563	-2.06697	Turquoise
We included three different criteria for hub genes identification (1) Connectivity of genes (2) Intra modular connectivity, which is sum of adjacencies with all connected genes (2) PCC with module eigengene (ME). The list contains 89 genes common in top 250 genes all modules taken together from each three criteria.
